# Supplementary material for: Effect of Melanin on the Stability of Casein Films Exposed to Artificially Accelerated UV Aging
Source: MDPI journal article supplement (doi:10.3390/coatings13071262), 2023-07-18
Supplement: s1 [file s1]

Archive with 1 entries (1 files):
- coatings-2453681-supplementary.pdf
