# Supplementary material for: Effect of Melanin on the Stability of Casein Films Exposed to Artificially Accelerated UV Aging
Source: MDPI journal article supplement (doi:10.3390/coatings13071262), 2023-07-18
Supplement: s1 [file s1 › coatings-2453681-supplementary.pdf]

Supplementary Information

# Effect of Melanin on the Stability of Casein Films Exposed to Artificially Accelerated UV Aging

Szymon Macieja <sup>1</sup>, Adam Lepczyński <sup>2</sup>, Mateusz Bernaciak <sup>2</sup>, Mariusz Śliwiński <sup>3</sup>, Artur Bartkowiak <sup>1</sup> and Łukasz Łopusiewicz <sup>1,\*</sup>

<sup>1</sup> Center of Bioimmobilisation and Innovative Packaging Materials, Faculty of Food Sciences and Fisheries, West Pomeranian University of Technology Szczecin, K. Janickiego 35, 71-270 Szczecin, Poland; szymon.macieja@zut.edu.pl (S.M.); artur.bartkowiak@zut.edu.pl (A.B.)

<sup>2</sup> Department of Physiology, Cytobiology and Proteomics, West Pomeranian University of Technology, K. Janickiego 32, 71-270 Szczecin, Poland; adam.lepczynski@zut.edu.pl (A.L.); mateusz.bernaciak@zut.edu.pl (M.B.)

<sup>3</sup> Dairy Industry Innovation Institute Ltd., Kormoranów 1, 11-700 Mrągowo, Poland; mariusz.sliwinski@iipm.pl

\* Correspondence: lukasz.lopusiewicz@zut.edu.pl

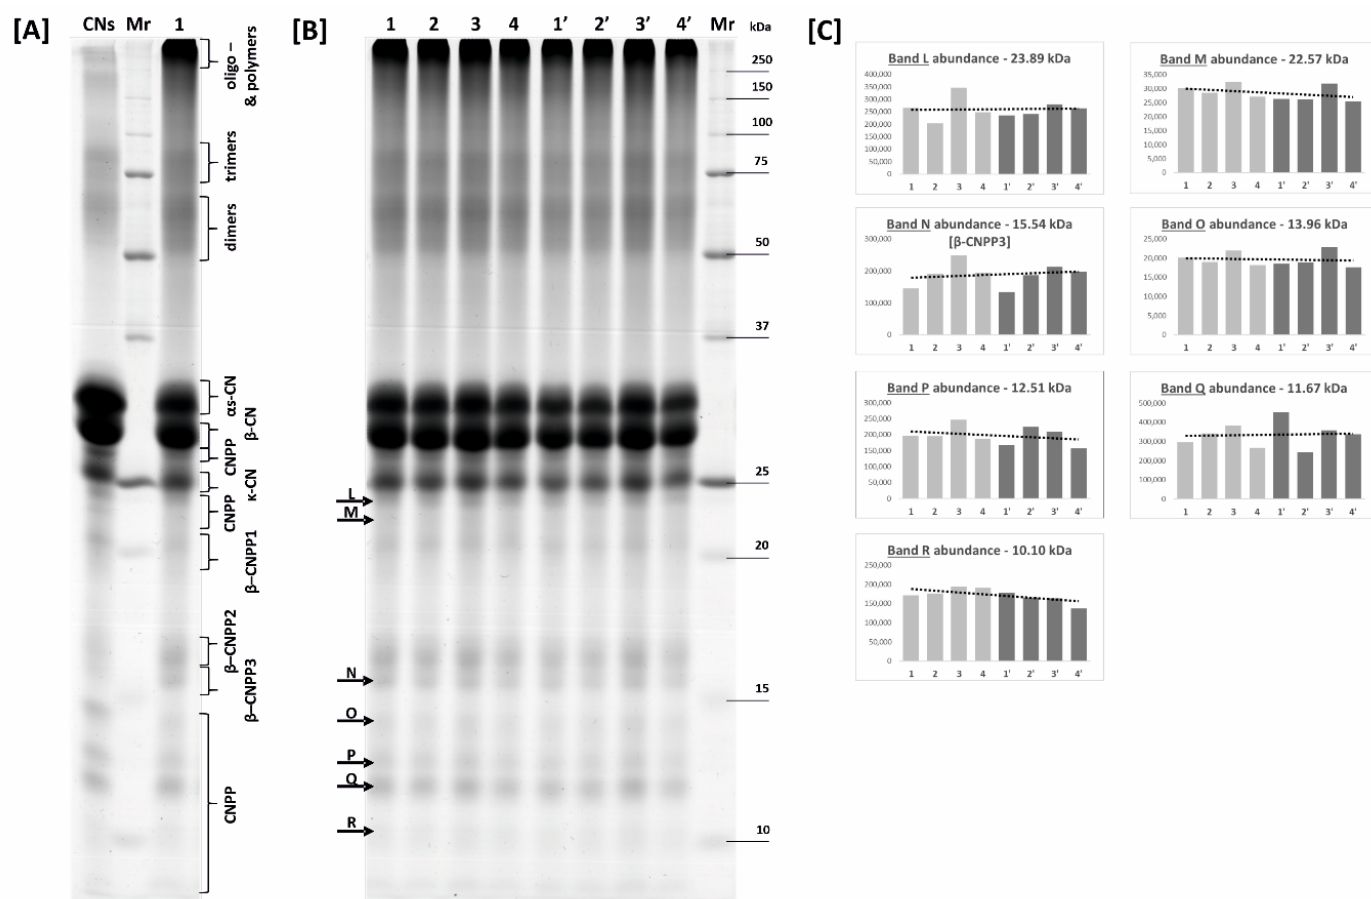

**Figure S1.** SDS-PAGE electropherograms of casein films. Panel A presents the protein profile of bovine milk casein fraction (CNs) that serves as reference for casein films protein profiles (1-4; 1'-4'). On line 1 representing the Cas sample protein profile the known bovine milk caseins and their dimers, trimers and oligo-, polymers as well as known caseins degradation products are marked according to [45–47]. Panel B represents the casein films protein profiles. Lines 1-4 represent respectively unaged: Cas, 0.10% MEL, 0.25% MEL and 0.50% MEL sample protein profiles. Analogically lines 1'-4' represent respectively artificially UV aged Cas, 0.10% MEL, 0.25% MEL and 0.50% MEL sample protein profiles. Lines marked Mr represent molecular range marker (kDa). Letters from

L to R marks the protein bands that represents milk caseins, and casein proteolysis products that have not differ between aged and unaged films. Panel C presents the graphs with the relative abundance of protein bands in particular lines 1-4 and 1'-4' with a trend line between the groups.  $\alpha$ -CN – alpha-caseins;  $\beta$ -CN – beta-casein,  $\kappa$ -CN – kappa-casein, CNPP – casein proteolysis product,  $\beta$ -CNPP1-3 – beta-casein proteolytic product 1, 2 or 3.
